# Supplementary material for: Reactions of the transient species Cr(CO)5(cyclohexane) with C4HnE (n = 4, 8; E = O, NH, S) studied by time-resolved IR absorption spectroscopy
Source: Royal Society of Chemistry journal article supplement (doi:10.1039/b612902a), 2006-10-27
Supplement: b612902a.pdf [file b612902a.pdf]

**Electronic Supporting Information**

**Reactions of the Transient Species  $\text{Cr}(\text{CO})_5(\text{cyclohexane})$  with  
 $\text{C}_4\text{H}_n\text{E}$  ( $n = 4, 8$ ;  $\text{E} = \text{O}, \text{NH}, \text{S}$ ) Studied by Time-Resolved  
Infrared Absorption Spectroscopy**

Lena Biber, Dana Reuvenov, Taliya Revzin, Tomer Sinai, Adva Zahavi, and  
Richard H. Schultz

*Department of Chemistry, Bar-Ilan University, Ramat-Gan 52900, Israel*

*E-mail: schultr@mail.biu.ac.il*

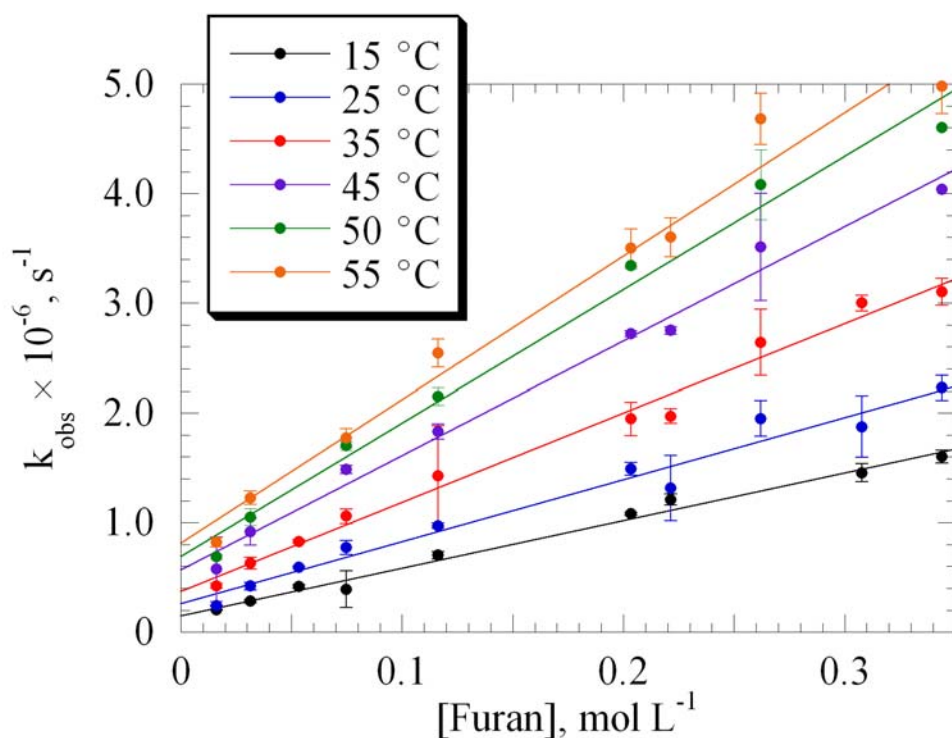

**Fig. S-1**  $k_{\text{obs}}$  as a function of  $[\text{L}]$  for reaction of  $\text{Cr}(\text{CO})_5(\text{CyH})$  with furan over the temperature range 15 EC - 55EC. The solid lines represent least-squares linear fits to the data.  $1\sigma$  error bars are shown.

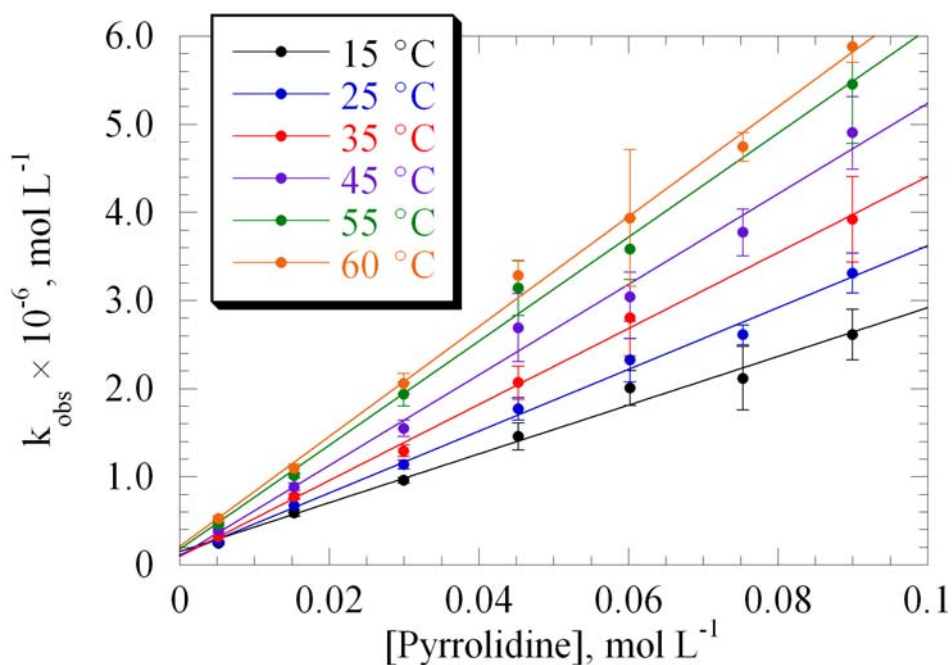

**Fig. S-2**  $k_{\text{obs}}$  as a function of  $[\text{L}]$  for reaction of  $\text{Cr}(\text{CO})_5(\text{CyH})$  with pyrrolidine over the temperature range 15 EC - 60 EC. The solid lines are least-squares linear fits to the data.  $1\sigma$  error bars are shown.

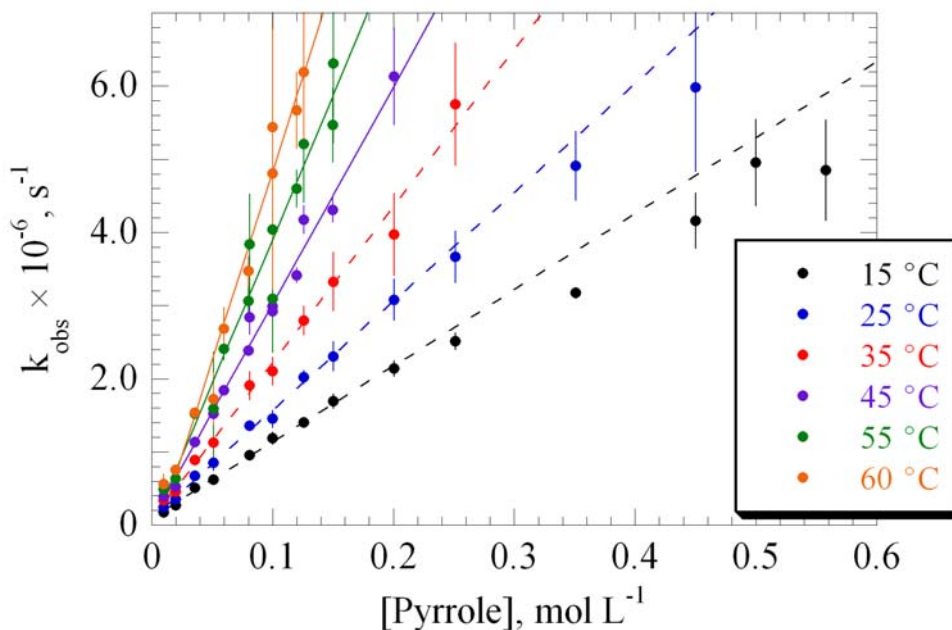

**Fig. S-3**  $k_{\text{obs}}$  as a function of the nominal concentration of [L] for reaction of  $\text{Cr}(\text{CO})_5(\text{CyH})$  with pyrrole, measured over the temperature range 15 EC - 60 EC. The dashed lines indicate least-squares linear fits to the data at 15 EC - 35 EC for  $[\text{Pyr}]_{\text{nom}} < 0.25 \text{ mol L}^{-1}$  (see the text). The solid lines represent least-squares linear fits to the entire data sets at higher temperatures.  $1\sigma$  error bars are shown.

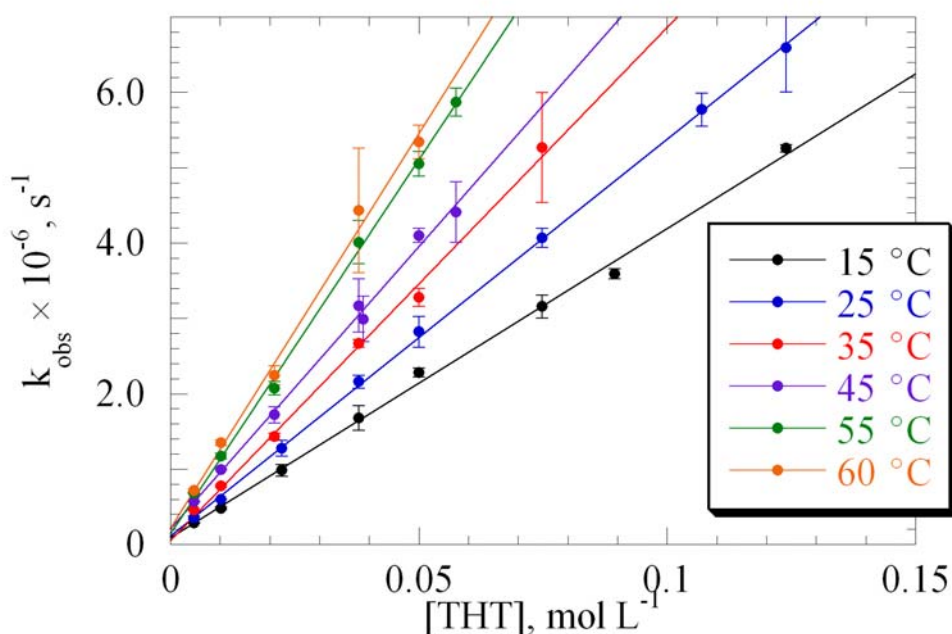

**Fig. S-4**  $k_{\text{obs}}$  as a function of [L] for the reaction of  $\text{Cr}(\text{CO})_5(\text{CyH})$  with tetrahydrothiophene over the temperature range 15 EC - 60 EC. The solid lines represent least-squares linear fits to data.  $1\sigma$  error bars are shown.

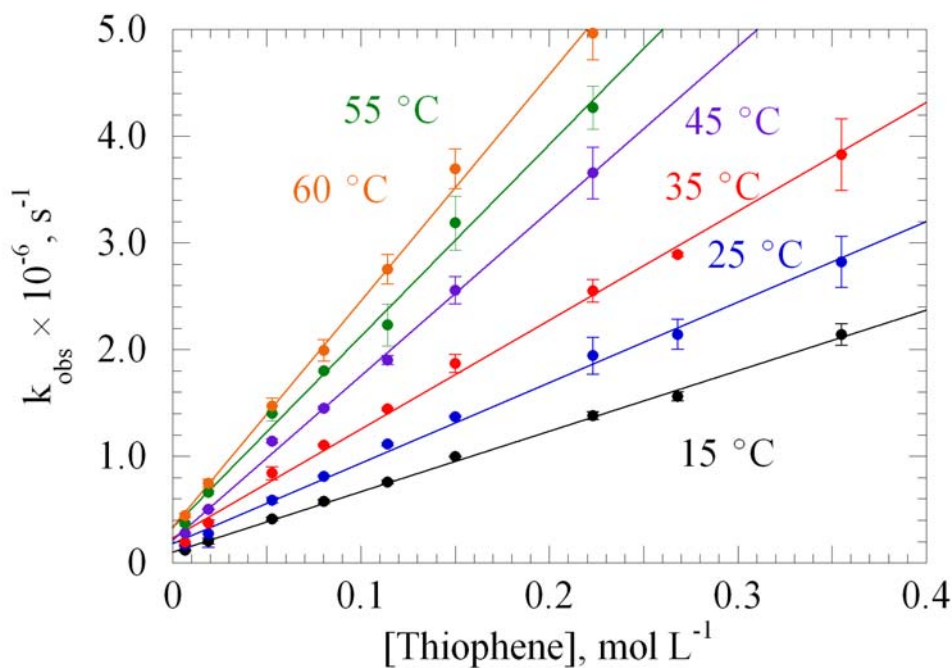

**Fig. S-5**  $k_{\text{obs}}$  as a function of  $[L]$  for the reaction of  $\text{Cr}(\text{CO})_5(\text{CyH})$  with thiophene over the temperature range 15 EC - 60 EC. The solid lines represent least-squares linear fits to data.  $1\sigma$  error bars are shown.

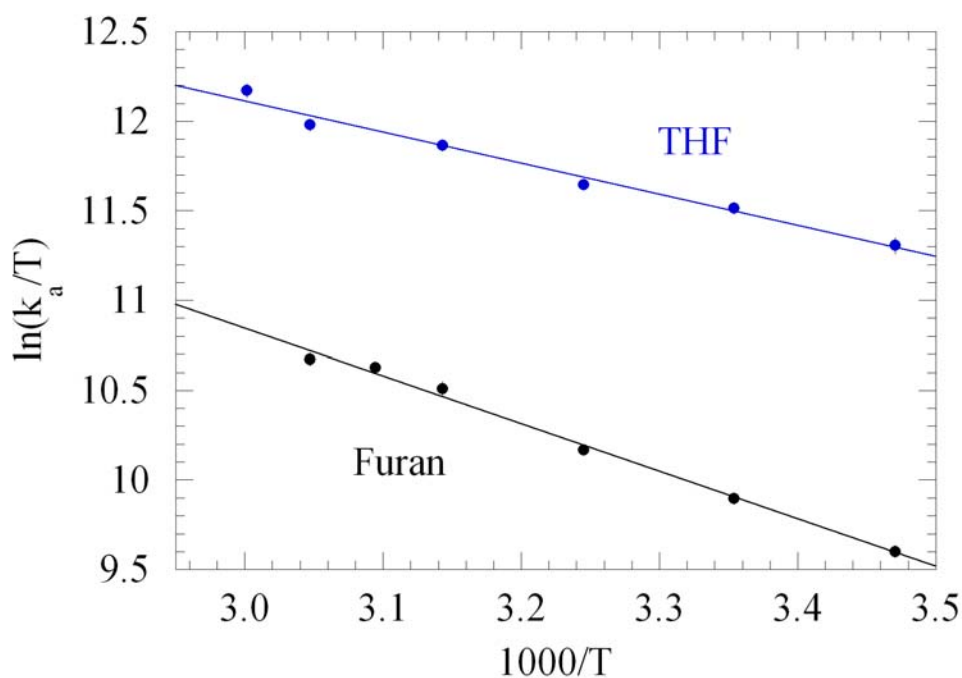

**Fig. S-6** Eyring plot for the reaction of  $\text{Cr}(\text{CO})_5(\text{CyH})$  with THF (blue) and furan (black). The solid lines represent least-squares fits to the data, yielding the activation parameters given in Table 3 of the text.

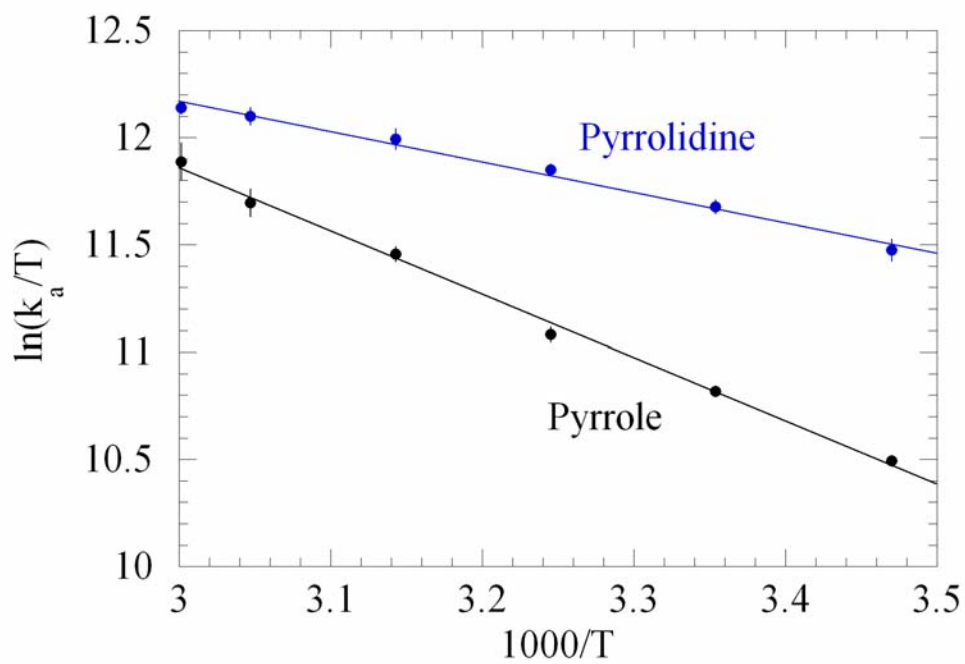

**Fig. S-7** Eyring plot for the reaction of  $\text{Cr}(\text{CO})_5(\text{CyH})$  with pyrrolidine (blue) and pyrrole (black). The solid lines represent least-squares fits to the data, yielding the activation parameters given in Table 3 of the text.

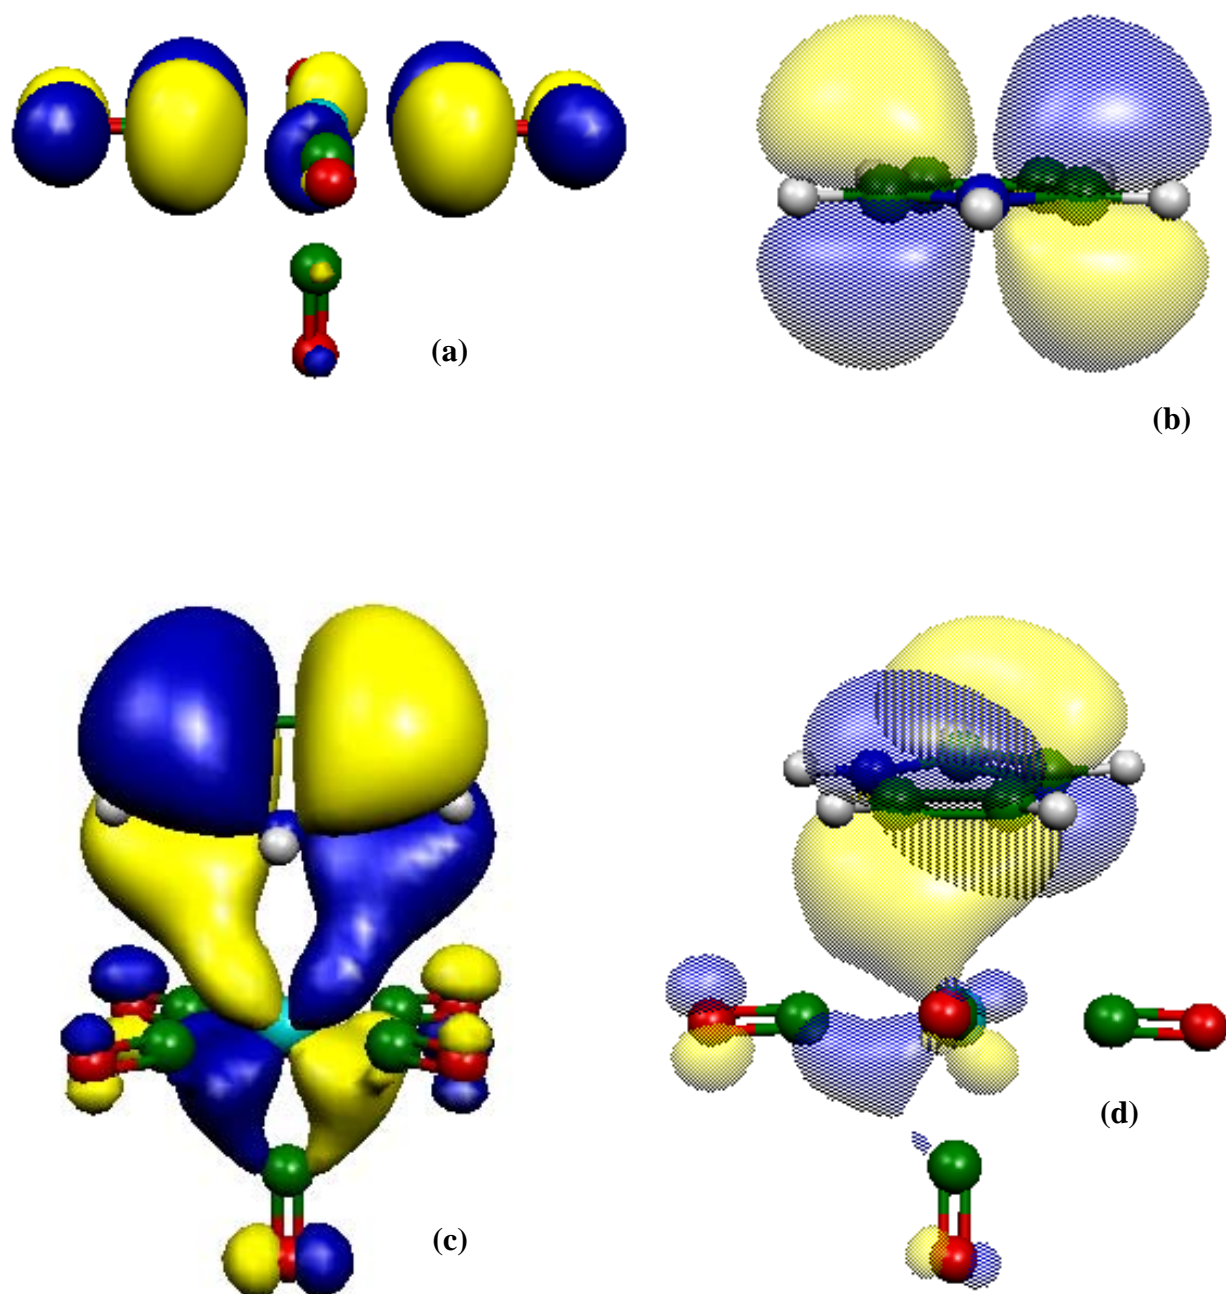

**Fig. S-8** MO structures as calculated by DFT. All MOs shown in this figure were calculated by using the B3LYP functional, the Stuttgart 1997 ECP basis set for Cr, and the 6-311++G(2d,2p) basis set for the other atoms. **(a)** Unoccupied MO (LUMO+2) of  $\text{Cr}(\text{CO})_5$ ; **(b)** HOMO of pyrrole; **(c)** MO (HOMO-3) of  $\text{Cr}(\text{CO})_5(\eta^1\text{-pyrrole})$  showing the metal-ligand interaction; **(d)** MO (HOMO-3) of  $\text{Cr}(\text{CO})_5(\eta^2\text{-pyrrole})$  showing the metal-ligand interaction.

**Table S-1** Pseudo-first order rate constants  $k_{\text{obs}}$  ( $\times 10^{-6}$ ,  $\text{s}^{-1}$ ) for reaction of  $\text{Cr}(\text{CO})_5(\text{CyH})$  with THF ( $1\sigma$  uncertainties in parentheses)

| [THF],<br>$\text{mol L}^{-1}$ | 15 EC                | 25 EC                | 35 EC               | 45 EC                | 55 EC              | 60 EC              |
|-------------------------------|----------------------|----------------------|---------------------|----------------------|--------------------|--------------------|
| 0.0050                        | 0.221 (0.021)        | 0.284 (0.025)        | 0.363 (0.006)       | 0.446 (0.008)        | 0.563 (0.013)      | 0.593 (0.051)      |
| <b>0.0110</b>                 | <b>0.404 (0.011)</b> | <b>0.516 (0.010)</b> | <b>0.718 (0.07)</b> | <b>0.831 (0.030)</b> | <b>1.06 (0.03)</b> | <b>1.11 (0.02)</b> |
| 0.0201                        | 0.746 (0.032)        | 0.811 (0.015)        | 1.13 (0.04)         | 1.52 (0.029)         | 1.74 (0.11)        | 1.90 (0.07)        |
| <b>0.0212</b>                 | <b>0.738 (0.016)</b> | <b>0.920 (0.094)</b> | <b>1.14 (0.03)</b>  | <b>1.37 (0.041)</b>  | <b>1.61 (0.04)</b> | <b>1.73 (0.10)</b> |
| 0.0407                        | 1.00 (0.01)          | 1.20 (0.03)          | 1.89 (0.11)         | 2.34 (0.075)         | 2.61 (0.22)        | 2.80 (0.21)        |
| <b>0.0518</b>                 | <b>1.36 (0.04)</b>   | <b>1.73 (0.09)</b>   | <b>2.15 (0.17)</b>  | <b>2.66 (0.22)</b>   | <b>3.31 (0.18)</b> | <b>3.56 (0.22)</b> |
| 0.0691                        | 1.99 (0.23)          | 2.32 (0.25)          | 2.70 (0.26)         | 3.53 (0.32)          | 3.98 (0.54)        | 5.08 (0.32)        |
| <b>0.0789</b>                 | <b>1.87 (0.09)</b>   | <b>2.54 (0.12)</b>   | <b>3.20 (0.23)</b>  | <b>3.83 (0.39)</b>   | <b>4.81 (0.54)</b> | <b>5.35 (0.37)</b> |
| 0.0916                        | 2.28 (0.11)          | 2.78 (0.05)          | 3.55 (0.16)         | 4.35 (0.61)          | 5.13 (0.58)        |                    |
| <b>0.102</b>                  | <b>2.59 (0.22)</b>   | <b>3.30 (0.18)</b>   | <b>3.86 (0.14)</b>  | <b>5.17 (0.22)</b>   |                    |                    |

**Table S-2** Pseudo-first order rate constants  $k_{\text{obs}}$  ( $\times 10^{-6}$ ,  $\text{s}^{-1}$ ) for reaction of  $\text{Cr}(\text{CO})_5(\text{CyH})$  with furan ( $1\sigma$  uncertainties in parentheses)

| [Furan],<br>$\text{mol L}^{-1}$ | 15 EC                | 25 EC                | 35 EC                | 45 EC               | 50 EC              | 55 EC              |
|---------------------------------|----------------------|----------------------|----------------------|---------------------|--------------------|--------------------|
| 0.0162                          | 0.200 (0.004)        | 0.242 (0.006)        | 0.421 (0.019)        | 0.573 (0.03)        | 0.686 (0.021)      | 0.821 (0.022)      |
| <b>0.0316</b>                   | <b>0.281 (0.014)</b> | <b>0.420 (0.034)</b> | <b>0.628 (0.054)</b> | <b>0.915 (0.12)</b> | <b>1.05 (0.08)</b> | <b>1.23 (0.11)</b> |
| 0.0534                          | 0.414 (0.016)        | 0.590 (0.011)        | 0.828 (0.011)        |                     |                    |                    |
| <b>0.0749</b>                   | <b>0.390 (0.017)</b> | <b>0.773 (0.062)</b> | <b>1.06 (0.06)</b>   | <b>1.48 (0.04)</b>  | <b>1.70 (0.04)</b> | <b>1.77 (0.10)</b> |
| 0.116                           | 0.700 (0.036)        | 0.971 (0.025)        | 1.43 (0.46)          | 1.83 (0.07)         | 2.15 (0.08)        | 2.54 (0.15)        |
| <b>0.203</b>                    | <b>1.08 (0.01)</b>   | <b>1.49 (0.06)</b>   | <b>1.95 (0.15)</b>   | <b>2.72 (0.03)</b>  | <b>3.34 (0.03)</b> | <b>3.50 (0.30)</b> |
| 0.221                           | 1.21 (0.05)          | 1.32 (0.30)          | 1.97 (0.07)          | 2.75 (0.03)         |                    | 3.60 (0.70)        |
| <b>0.262</b>                    |                      | <b>1.95 (0.16)</b>   | <b>2.64 (0.30)</b>   | <b>3.51 (0.49)</b>  | <b>4.08 (0.32)</b> | <b>4.68 (0.30)</b> |
| 0.308                           | 1.45 (0.08)          | 1.87 (0.28)          | 3.00 (0.07)          |                     |                    |                    |
| <b>0.344</b>                    | <b>1.60 (0.06)</b>   | <b>2.22 (0.11)</b>   | <b>3.10 (0.12)</b>   | <b>4.69 (0.32)</b>  | <b>5.12 (0.60)</b> | <b>5.49 (0.59)</b> |

**Table S-3** Pseudo-first order rate constants  $k_{\text{obs}}$  ( $\times 10^{-6}$ ,  $\text{s}^{-1}$ ) for reaction of  $\text{Cr}(\text{CO})_5(\text{CyH})$  with pyrrolidine ( $1\sigma$  uncertainties in parentheses)

| [L],<br>$\text{mol L}^{-1}$ | 15 EC                | 25 EC                | 35 EC                | 45 EC                | 55 EC              | 60 EC              |
|-----------------------------|----------------------|----------------------|----------------------|----------------------|--------------------|--------------------|
| 0.0052                      | 0.240 (0.012)        | 0.264 (0.006)        | 0.323 (0.008)        | 0.391 (0.027)        | 0.461 (0.018)      | 0.528 (0.020)      |
| <b>0.0153</b>               | <b>0.587 (0.039)</b> | <b>0.670 (0.076)</b> | <b>0.773 (0.031)</b> | <b>0.885 (0.043)</b> | <b>1.01 (0.03)</b> | <b>1.09 (0.05)</b> |
| 0.0300                      | 0.958 (0.030)        | 1.14 (0.05)          | 1.29 (0.07)          | 1.55 (0.091)         | 1.94 (0.13)        | 2.06 (0.12)        |
| <b>0.0453</b>               | <b>1.46 (0.15)</b>   | <b>1.77 (0.13)</b>   | <b>2.07 (0.19)</b>   | <b>2.69 (0.39)</b>   | <b>3.14 (0.31)</b> | <b>3.28 (0.17)</b> |
| 0.0603                      | 2.01 (0.20)          | 2.32 (0.25)          | 2.80 (0.43)          | 3.04 (0.28)          | 3.58 (0.35)        | 3.94 (0.78)        |
| <b>0.0753</b>               | <b>2.12 (0.36)</b>   | <b>2.61 (0.11)</b>   |                      | <b>3.77 (0.26)</b>   |                    | <b>4.74 (0.16)</b> |
| 0.0900                      | 2.61 (0.29)          | 3.31 (0.23)          | 3.93 (0.48)          | 4.90 (0.41)          | 5.46 (0.67)        | 5.88 (0.18)        |



**Table S-4** Pseudo-first order rate constants  $k_{\text{obs}}$  ( $\times 10^{-6}$ ,  $\text{s}^{-1}$ ) for reaction of  $\text{Cr}(\text{CO})_5(\text{CyH})$  with pyrrole ( $1\sigma$  uncertainties in parentheses)

| [Pyrrole],<br>$\text{mol L}^{-1}$ | 15 EC                | 25 EC                | 35 EC                | 45 EC                | 55 EC                | 60 EC               |
|-----------------------------------|----------------------|----------------------|----------------------|----------------------|----------------------|---------------------|
| 0.0100                            | 0.176 (0.008)        | 0.242 (0.034)        | 0.336 (0.048)        | 0.386 (0.037)        | 0.487 (0.17)         | 0.559 (0.13)        |
| <b>0.0200</b>                     | <b>0.273 (0.012)</b> | <b>0.350 (0.012)</b> | <b>0.455 (0.015)</b> | <b>0.522 (0.046)</b> | <b>0.634 (0.038)</b> | <b>0.751 (0.73)</b> |
| 0.0356                            | 0.511 (0.009)        | 0.670 (0.017)        | 0.885 (0.017)        | 1.14 (0.022)         | 1.52 (0.07)          | 1.54 (0.021)        |
| <b>0.0514</b>                     | <b>0.621 (0.018)</b> | <b>0.847 (0.10)</b>  | <b>1.13 (0.15)</b>   | <b>1.52 (0.078)</b>  | <b>2.41 (0.15)</b>   | <b>1.72 (0.35)</b>  |
| 0.0601                            |                      |                      |                      | 1.84 (0.036)         | 3.06 (0.24)          | 2.68 (0.29)         |
| <b>0.0801</b>                     |                      |                      |                      | <b>2.39 (0.058)</b>  | <b>3.84 (0.68)</b>   | <b>3.47 (0.21)</b>  |
| 0.0812                            | 0.956 (0.026)        | 1.355 (0.053)        | 1.91 (0.19)          | 2.84 (0.23)          | 4.04 (0.24)          |                     |
| <b>0.100</b>                      |                      |                      |                      | <b>2.92 (0.10)</b>   |                      | <b>4.80 (0.24)</b>  |
| 0.100                             | 1.19 (0.08)          | 1.45 (0.11)          | 2.10 (0.19)          | 2.99 (0.53)          | 4.60 (0.25)          | 5.44 (2.20)         |
| <b>0.120</b>                      |                      |                      |                      | <b>3.41 (0.10)</b>   | <b>5.21 (0.80)</b>   | <b>5.67 (0.52)</b>  |
| 0.126                             | 1.40 (0.04)          | 2.02 (0.09)          | 2.79 (0.19)          | 4.17 (0.19)          | 5.47 (0.51)          | 6.19 (0.99)         |
| <b>0.150</b>                      |                      |                      |                      | <b>4.31 (0.17)</b>   | <b>6.31 (1.09)</b>   |                     |
| 0.151                             | 1.69 (0.10)          | 2.31 (0.20)          | 3.32 (0.40)          |                      |                      |                     |
| <b>0.201</b>                      | <b>2.14 (0.11)</b>   | <b>3.08 (0.28)</b>   | <b>3.97 (0.56)</b>   | <b>6.13 (0.66)</b>   |                      |                     |
| 0.252                             | 2.51 (0.11)          | 3.67 (0.35)          | 5.75 (0.83)          |                      |                      |                     |
| <b>0.351</b>                      | <b>3.17 (0.07)</b>   | <b>4.91 (0.47)</b>   |                      |                      |                      |                     |
| 0.450                             | 4.16 (0.38)          | 5.98 (1.15)          |                      |                      |                      |                     |
| <b>0.500</b>                      | <b>4.95 (0.59)</b>   |                      |                      |                      |                      |                     |
| 0.558                             | 4.85 (0.68)          |                      |                      |                      |                      |                     |
| <b>0.750</b>                      | <b>6.04 (0.04)</b>   |                      |                      |                      |                      |                     |

**Table S-5** Pseudo-first order rate constants  $k_{\text{obs}}$  ( $\times 10^{-6}$ ,  $\text{s}^{-1}$ ) for reaction of  $\text{Cr}(\text{CO})_5(\text{CyH})$  with tetrahydrothiophene ( $1\sigma$  uncertainties in parentheses)

| $[\text{THT}]_0$ ,<br>$\text{mol L}^{-1}$ | 15 EC                | 25 EC                | 35 EC                | 45 EC                | 55 EC              | 60 EC              |
|-------------------------------------------|----------------------|----------------------|----------------------|----------------------|--------------------|--------------------|
| 0.00480                                   | 0.287 (0.007)        | 0.350 (0.020)        | 0.452 (0.006)        | 0.567 (0.006)        | 0.678 (0.007)      | 0.716 (0.014)      |
| <b>0.0102</b>                             | <b>0.481 (0.015)</b> | <b>0.597 (0.003)</b> | <b>0.777 (0.015)</b> | <b>0.994 (0.013)</b> | <b>1.17 (0.04)</b> | <b>1.35 (0.04)</b> |
| 0.0210                                    |                      |                      | 1.43 (0.045)         | 1.72 (0.11)          | 2.07 (0.09)        | 2.24 (0.13)        |
| <b>0.0224</b>                             | <b>0.981 (0.078)</b> | <b>1.28 (0.11)</b>   |                      |                      |                    |                    |
| 0.0380                                    | 1.67 (0.17)          | 2.16 (0.09)          | 2.67 (0.05)          | 3.17 (0.35)          | 4.01 (0.29)        | 4.43 (0.83)        |
| <b>0.0388</b>                             |                      |                      |                      | <b>2.99 (0.30)</b>   |                    |                    |
| 0.0500                                    | 2.28 (0.06)          | 2.82 (0.20)          | 3.28 (0.12)          | 4.10 (0.09)          | 5.05 (0.16)        | 5.34 (0.22)        |
| <b>0.0574</b>                             |                      |                      |                      | <b>4.41 (0.40)</b>   | <b>5.87 (0.19)</b> |                    |
| 0.0749                                    | 3.16 (0.15)          | 4.07 (0.13)          | 5.27 (0.73)          |                      |                    |                    |
| <b>0.0895</b>                             | <b>3.59 (0.07)</b>   |                      |                      |                      |                    |                    |
| 0.107                                     |                      | 5.77 (0.22)          |                      |                      |                    |                    |
| <b>0.124</b>                              | <b>5.26 (0.05)</b>   | <b>6.59 (0.59)</b>   |                      |                      |                    |                    |

**Table S-6** Pseudo-first order rate constants  $k_{\text{obs}}$  ( $\times 10^{-6}$ ,  $\text{s}^{-1}$ ) for reaction of  $\text{Cr}(\text{CO})_5(\text{CyH})$  with thiophene ( $1\sigma$  uncertainties in parentheses)

| [Thiophene],<br>mol L <sup>-1</sup> | 15 EC                | 25 EC                | 35 EC                | 45 EC                | 55 EC                | 60 EC                |
|-------------------------------------|----------------------|----------------------|----------------------|----------------------|----------------------|----------------------|
| 0.0068                              | 0.117 (0.008)        | 0.165 (0.008)        | 0.192 (0.001)        | 0.275 (0.005)        | 0.368 (0.020)        | 0.443 (0.018)        |
| <b>0.0190</b>                       | <b>0.205 (0.026)</b> | <b>0.273 (0.013)</b> | <b>0.372 (0.001)</b> | <b>0.503 (0.005)</b> | <b>0.661 (0.015)</b> | <b>0.746 (0.020)</b> |
| 0.0529                              | 0.410 (0.015)        | 0.585 (0.028)        | 0.839 (0.063)        | 1.14 (0.02)          | 1.40 (0.07)          | 1.47 (0.06)          |
| <b>0.0804</b>                       | <b>0.573 (0.019)</b> | <b>0.811 (0.007)</b> | <b>1.10 (0.01)</b>   | <b>1.45 (0.01)</b>   | <b>1.80 (0.01)</b>   | <b>1.99 (0.01)</b>   |
| 0.114                               | 0.754 (0.016)        | 1.11 (0.01)          | 1.44 (0.01)          | 1.90 (0.04)          | 2.23 (0.20)          | 2.75 (0.10)          |
| <b>0.150</b>                        | <b>0.996 (0.006)</b> | <b>1.37 (0.10)</b>   | <b>1.87 (0.08)</b>   | <b>2.55 (0.13)</b>   | <b>3.19 (0.25)</b>   | <b>3.69 (0.24)</b>   |
| 0.223                               | 1.38 (0.036)         | 1.94 (0.17)          | 2.55 (0.11)          | 3.65 (0.24)          | 4.27 (0.20)          | 4.96 (0.50)          |
| <b>0.268</b>                        | <b>1.56 (0.042)</b>  | <b>2.14 (0.14)</b>   | <b>2.89 (0.02)</b>   |                      |                      |                      |
| 0.355                               | 2.14 (0.10)          | 2.82 (0.24)          | 3.83 (0.33)          |                      |                      |                      |
